# Supplementary material for: Correlation between Antimicrobial Resistance and the Hospital-Wide Diverse Use of Broad-Spectrum Antibiotics by the Antimicrobial Stewardship Program in Japan
Source: MDPI journal article supplement (doi:10.3390/pharmaceutics15020518), 2023-02-03
Supplement: s1 [file s1]

### Supplementary Materials:

#### Correlation between Antimicrobial Resistance and the Hospital-wide Diverse Use of Broad-Spectrum Antibiotics by the Antimicrobial Stewardship Program in Japan

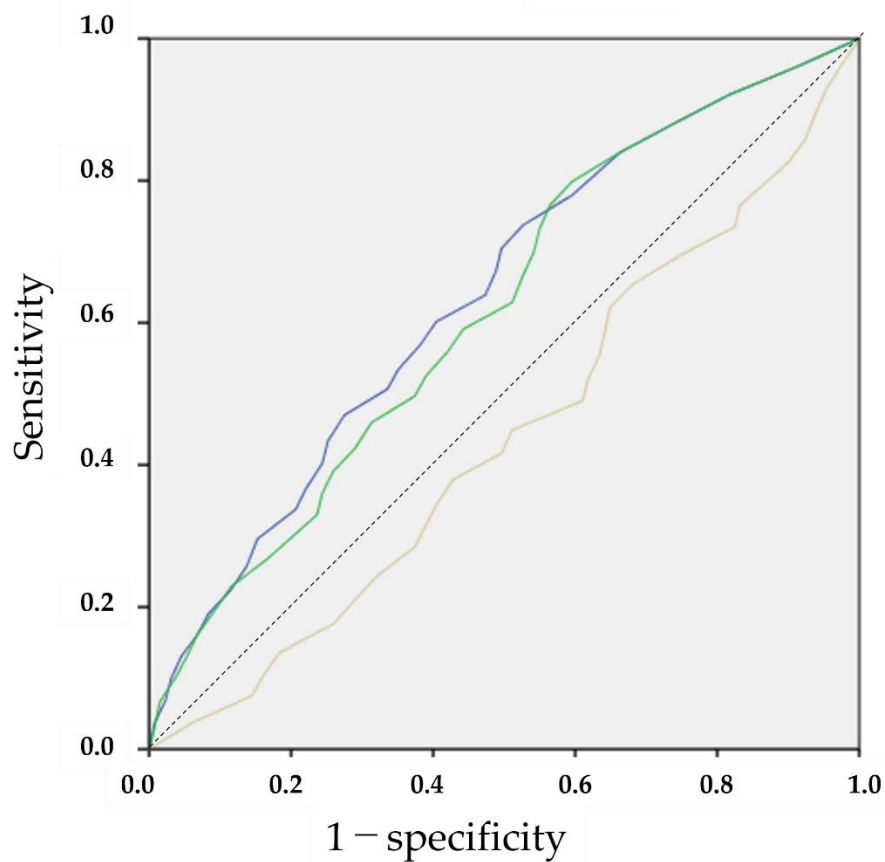

**Figure S1.** Receiver operating characteristic curve showing the detection ability for *Klebsiella pneumoniae* with resistance against  $\geq 2$  classes of antibiotics of the antibiotic heterogeneity index (AHI), the modified AHI, and the overall days of therapy/100 patient-days (DOT) for broad-spectrum antibiotics commonly used for hospital-onset infections. Blue line, AHI; green line, modified AHI; yellow line, DOT.

**Table S1.** Abbreviation list

|      |                                             |              |                                                            |
|------|---------------------------------------------|--------------|------------------------------------------------------------|
| AHI  | Antibiotic heterogeneity index              | ESBL         | Extended-spectrum $\beta$ -lactamase                       |
| AMR  | Antimicrobial resistance                    | EUCAST       | European Committee on Antimicrobial Susceptibility Testing |
| AS   | Antibiotic stewardship                      | ICU          | Intensive care unit                                        |
| CLSI | Clinical and Laboratory Standards Institute | MIC          | Minimum inhibitory concentration                           |
| CRE  | Carbapenem-resistant Enterobacteriaceae     | Modified AHI | Modified antibiotic heterogeneity index                    |
| CPE  | Carbapenemase-producing Enterobacteriaceae  | PAMS         | Periodic monitoring and supervision                        |
| DOT  | Days of therapy                             | SAAR         | Standardized antimicrobial administration ratio            |

**Table S2.** Method of calculation for antibiotic heterogeneity indices

|                                      |                                                                                                                                                                                                                                                                                                                                                                                                                                                                                                                                                                                                                                                                                                                                                                                                                                                                                                                                |
|--------------------------------------|--------------------------------------------------------------------------------------------------------------------------------------------------------------------------------------------------------------------------------------------------------------------------------------------------------------------------------------------------------------------------------------------------------------------------------------------------------------------------------------------------------------------------------------------------------------------------------------------------------------------------------------------------------------------------------------------------------------------------------------------------------------------------------------------------------------------------------------------------------------------------------------------------------------------------------|
| Antibiotic heterogeneity index (AHI) | $AHI = 1 - \{n/(2 \times [n - 1])\} \times \sum  ai - bi $ <p><b>n</b>: the number of antibiotic classes. n = 4 in this study.<br/> <b>ai</b>: 0.25 for each antibiotic class when 4 antibiotic classes are equally used<br/> <b>bi</b>: the proportion of observed day of therapy (DOT) for each antibiotic class</p> <ol style="list-style-type: none"> <li>When the observed proportion of DOT (% DOT) is 25% in carbapenems, 25% in piperacillin/tazobactam, 25% in cephalosporins/ceftazidime/aztreonam and 25% in fluoroquinolones, "AHI = 1" is achieved.</li> <li>When the proportion of DOT is 40% in carbapenems, 30% in piperacillin/tazobactam, 20% in cephalosporins/ceftazidime/aztreonam and 10% in fluoroquinolones, AHI is calculated as follows;<br/> <math display="block">AHI = 1 - \{4/(2 \times [4 - 1])\} \times ( 0.4 - 0.25  +  0.3 - 0.25  +  0.2 - 0.25  +  0.1 - 0.25 ) = 0.733</math> </li> </ol> |
| Modified AHI                         | <p><b>n</b> = 4<br/> <b>ai</b>: 0.1 for fluoroquinolones and 0.3 for remaining 3 antibiotic classes</p> <ol style="list-style-type: none"> <li>When the observed %DOT is 30% in carbapenems, 30% in piperacillin/tazobactam, 30% in cephalosporins/ceftazidime/aztreonam and 10% in fluoroquinolones, "modified AHI = 1" is achieved.</li> <li>When the observed %DOT is 40% in carbapenems, 30% in piperacillin/tazobactam, 20% in cephalosporins/ceftazidime/aztreonam and 10% in fluoroquinolones, AHI is calculated as follows;<br/> <math display="block">AHI = 1 - \{4/(2 \times [4 - 1])\} \times ( 0.4 - 0.3  +  0.3 - 0.3  +  0.2 - 0.3  +  0.1 - 0.1 ) = 0.866</math> </li> </ol>                                                                                                                                                                                                                                    |

**Table S3.** MIC breakpoints based on EUCAST and the CLSI in *Pseudomonas aeruginosa*, *Acinetobacter baumannii*, and Enterobacteriaceae spp.

| Organisms                      | Antimicrobial agent     | MIC breakpoint (µg/mL)                                |                           |
|--------------------------------|-------------------------|-------------------------------------------------------|---------------------------|
|                                |                         | CLSI 2018<br>Resistant/intermediate<br>susceptibility | EUCAST 2023<br>Resistance |
| <i>Pseudomonas aeruginosa</i>  | Meropenem               | ≥4                                                    | ≥16                       |
|                                | Piperacillin/tazobactam | ≥32                                                   | ≥32                       |
|                                | Cefepime                | ≥16                                                   | ≥16                       |
|                                | Ciprofloxacin           | ≥2                                                    | ≥1                        |
|                                | Amikacin                | ≥32                                                   | ≥32                       |
|                                | Gentamicin              | ≥8                                                    | —                         |
| <i>Acinetobacter baumannii</i> | Meropenem               | ≥4                                                    | ≥16                       |
|                                | Piperacillin/tazobactam | ≥32                                                   | — *                       |
|                                | Cefepime                | ≥16                                                   | — *                       |
|                                | Ciprofloxacin           | ≥2                                                    | ≥2                        |
|                                | Amikacin                | ≥32                                                   | ≥16                       |
|                                | Gentamicin              | ≥8                                                    | ≥8                        |
| Enterobacteriaceae spp.        | Meropenem               | ≥2                                                    | ≥16                       |
|                                | Piperacillin/tazobactam | ≥32                                                   | ≥16                       |
|                                | Cefepime                | ≥4                                                    | ≥8                        |
|                                | Levofloxacin            | ≥4                                                    | ≥2                        |
|                                | Amikacin                | ≥32                                                   | ≥16                       |
|                                | Gentamicin              | ≥8                                                    | ≥4                        |

MIC: minimum inhibitory concentration; EUCAST: European committee on antimicrobial susceptibility testing; CLSI: the Clinical and Laboratory Standards Institute; \*: Criteria for *Pseudomonas aeruginosa* were used

**Table S4.** Patient background information for each year between April 2015 and March 2022.

| Factors                                      | 2015 Apr.–<br>2016 Mar. | 2016 Apr.–<br>2017 Mar. | 2017 Apr.–<br>2018 Mar. | 2018 Apr.–<br>2019 Mar. | 2019 Apr.–<br>2020 Mar. | 2020 Apr.–<br>2021 Mar. | 2021 Apr.–<br>2022 Mar. |
|----------------------------------------------|-------------------------|-------------------------|-------------------------|-------------------------|-------------------------|-------------------------|-------------------------|
| Hospitalization                              | 22,820                  | 23,303                  | 23,866                  | 23,863                  | 24,415                  | 21,931                  | 21,264                  |
| Number of patients undergoing surgery (rate) | 6519 (28.6%)            | 6465 (27.7%)            | 6567 (27.5%)            | 6431 (26.9%)            | 6510 (26.7%)            | 6117 (27.9%)            | 6090 (28.6%)            |
| Male (%)                                     | 11849 (51.9%)           | 12231 (52.5%)           | 12406 (52.0%)           | 12359 (51.8%)           | 12557 (51.4%)           | 11351 (51.8%)           | 10893 (51.2%)           |
| Age                                          |                         |                         |                         |                         |                         |                         |                         |
| 0–9 years                                    | 8.4%                    | 8.4%                    | 8.3%                    | 8.2%                    | 8.0%                    | 8.1%                    | 8.6%                    |
| 10–19 years                                  | 4.0%                    | 3.7%                    | 3.5%                    | 3.4%                    | 3.7%                    | 3.7%                    | 3.5%                    |
| 20–29 years                                  | 4.7%                    | 4.6%                    | 4.3%                    | 4.2%                    | 4.0%                    | 4.1%                    | 4.4%                    |
| 30–39 years                                  | 7.8%                    | 7.4%                    | 7.0%                    | 6.8%                    | 6.8%                    | 6.7%                    | 7.0%                    |
| 40–49 years                                  | 9.6%                    | 9.8%                    | 9.6%                    | 9.8%                    | 9.3%                    | 9.4%                    | 9.0%                    |
| 50–59 years                                  | 11.0%                   | 10.8%                   | 11.2%                   | 11.4%                   | 11.3%                   | 11.9%                   | 12.1%                   |
| 60–69 years                                  | 19.7%                   | 19.9%                   | 18.8%                   | 17.4%                   | 16.2%                   | 15.7%                   | 15.0%                   |
| 70–79 years                                  | 22.7%                   | 22.5%                   | 23.5%                   | 24.5%                   | 25.4%                   | 25.1%                   | 24.6%                   |
| 80–89 years                                  | 10.8%                   | 11.7%                   | 12.6%                   | 12.8%                   | 13.6%                   | 13.4%                   | 14.2%                   |
| >90 years                                    | 1.1%                    | 1.2%                    | 1.1%                    | 1.5%                    | 1.6%                    | 1.8%                    | 1.6%                    |
| Patient-days                                 | 280,378                 | 284,665                 | 283,285                 | 278,550                 | 283,669                 | 265,000                 | 254,776                 |
| Cardiovascular medicine                      | 13,129 (4.7%)           | 14,410 (5.1%)           | 14,756 (5.2%)           | 16,544 (5.9%)           | 16,040 (5.7%)           | 15,992 (6.0%)           | 15,043 (5.9%)           |
| Hematology                                   | 14,532 (5.2%)           | 16,624 (5.8%)           | 16,784 (5.9%)           | 16,390 (5.9%)           | 15,434 (5.4%)           | 15,632 (5.9%)           | 14,797 (5.8%)           |
| Allergy and rheumatology                     | 5,777 (2.1%)            | 6,294 (2.2%)            | 7,205 (2.5%)            | 6,300 (2.3%)            | 5,090 (1.8%)            | 4,995 (1.9%)            | 4,228 (1.7%)            |
| Diabetes, metabolism, and endocrinology      | 8,643 (3.1%)            | 9,000 (3.2%)            | 9,484 (3.3%)            | 8,030 (2.9%)            | 7,502 (2.6%)            | 6,978 (2.6%)            | 6,357 (2.5%)            |
| Gastroenterology                             | 31,470 (11.2%)          | 32,205 (11.3%)          | 31,833 (11.2%)          | 31,608 (11.3%)          | 31,300 (11.0%)          | 28,486 (10.7%)          | 26,667 (10.5%)          |
| Respiratory medicine                         | 16,506 (5.9%)           | 15,712 (5.5%)           | 16,097 (5.7%)           | 16,341 (5.9%)           | 16,179 (5.7%)           | 15,338 (5.8%)           | 15,226 (6.0%)           |
| Neurology                                    | 6,771 (2.4%)            | 7,120 (2.5%)            | 7,420 (2.6%)            | 6,751 (2.4%)            | 7,650 (2.7%)            | 6,258 (2.4%)            | 6,070 (2.4%)            |
| Nephrology and artificial dialysis           | 7,155 (2.6%)            | 7,477 (2.6%)            | 7,637 (2.7%)            | 7,118 (2.6%)            | 7,643 (2.7%)            | 7,591 (2.9%)            | 7,032 (2.8%)            |
| General medicine                             | 0 (0.0%)                | 0 (0.0%)                | 0 (0.0%)                | 631 (0.2%)              | 896 (0.3%)              | 0 (0.0%)                | 0 (0.0%)                |
| Pediatrics                                   | 5,591 (2.0%)            | 5,413 (1.9%)            | 5,363 (1.9%)            | 4,166 (1.5%)            | 4,794 (1.7%)            | 3,637 (1.4%)            | 4,618 (1.8%)            |
| Neonatal intensive care unit                 | 10,175 (3.6%)           | 8,395 (2.9%)            | 6,549 (2.3%)            | 7,555 (2.7%)            | 6,356 (2.2%)            | 6,919 (2.6%)            | 6,928 (2.7%)            |
| Pediatric surgery                            | 954 (0.3%)              | 1,102 (0.4%)            | 1,168 (0.4%)            | 964 (0.3%)              | 872 (0.3%)              | 1,361 (0.5%)            | 937 (0.4%)              |
| Gastroenterological surgery                  | 31,380 (11.2%)          | 30,553 (10.7%)          | 28,656 (10.1%)          | 27,427 (9.8%)           | 29,102 (10.3%)          | 27,314 (10.3%)          | 27,279 (10.7%)          |
| Breast and endocrine surgery                 | 4,593 (1.6%)            | 4,398 (1.5%)            | 3,829 (1.4%)            | 3,677 (1.3%)            | 3,302 (1.2%)            | 3,324 (1.3%)            | 2,998 (1.2%)            |
| Cardiovascular surgery                       | 6,359 (2.3%)            | 6,129 (2.2%)            | 6,237 (2.2%)            | 6,984 (2.5%)            | 7,887 (2.8%)            | 7,070 (2.7%)            | 5,783 (2.3%)            |
| Thoracic surgery                             | 7,751 (2.8%)            | 6,886 (2.4%)            | 7,193 (2.5%)            | 7,250 (2.6%)            | 8,598 (3.0%)            | 7,870 (3.0%)            | 7,961 (3.1%)            |
| Orthopedic surgery                           | 20,022 (7.1%)           | 20,088 (7.1%)           | 19,563 (6.9%)           | 19,369 (7.0%)           | 19,606 (6.9%)           | 17,224 (6.5%)           | 16,361 (6.4%)           |
| Plastic and reconstructive surgery           | 2,799 (1.0%)            | 2,189 (0.8%)            | 1,709 (0.6%)            | 2,039 (0.7%)            | 1,997 (0.7%)            | 1,449 (0.5%)            | 1,860 (0.7%)            |
| Neurosurgery                                 | 16,081 (5.7%)           | 17,944 (6.3%)           | 21,987 (7.8%)           | 17,912 (6.4%)           | 21,375 (7.5%)           | 20,662 (7.8%)           | 21,317 (8.4%)           |
| Dermatology                                  | 1,813 (0.6%)            | 2,379 (0.8%)            | 2,829 (1.0%)            | 2,483 (0.9%)            | 2,466 (0.9%)            | 2,058 (0.8%)            | 2,097 (0.8%)            |
| Urology                                      | 10,116 (3.6%)           | 9,505 (3.3%)            | 9,918 (3.5%)            | 10,881 (3.9%)           | 10,193 (3.6%)           | 10,385 (3.9%)           | 9,557 (3.8%)            |
| Obstetrics and gynecology                    | 11,767 (4.2%)           | 10,873 (3.8%)           | 11,059 (3.9%)           | 10,403 (3.7%)           | 11,832 (4.2%)           | 11,383 (4.3%)           | 9,980 (3.9%)            |
| Ophthalmology                                | 11,832 (4.2%)           | 12,065 (4.2%)           | 11,342 (4.0%)           | 10,944 (3.9%)           | 10,758 (3.8%)           | 10,038 (3.8%)           | 9,908 (3.9%)            |
| Otorhinolaryngology                          | 9,532 (3.4%)            | 10,510 (3.7%)           | 8,711 (3.1%)            | 9,534 (3.4%)            | 9,389 (3.3%)            | 7,924 (3.0%)            | 9,645 (3.8%)            |
| Radiology                                    | 1,396 (0.5%)            | 1,832 (0.6%)            | 1,605 (0.6%)            | 1,341 (0.5%)            | 1,229 (0.4%)            | 1,146 (0.4%)            | 973 (0.4%)              |
| Dentistry and oral surgery                   | 3,601 (1.3%)            | 3,281 (1.2%)            | 2,807 (1.0%)            | 3,918 (1.4%)            | 3,398 (1.2%)            | 3,094 (1.2%)            | 3,222 (1.3%)            |
| Anesthesiology and pain relief center        | 856 (0.3%)              | 892 (0.3%)              | 708 (0.2%)              | 1,156 (0.4%)            | 1,053 (0.4%)            | 1,090 (0.4%)            | 1,453 (0.6%)            |
| Emergency and critical care medicine         | 8,780 (3.1%)            | 8,468 (3.0%)            | 9,197 (3.2%)            | 9,904 (3.6%)            | 11,385 (4.0%)           | 9,164 (3.5%)            | 9,137 (3.6%)            |
| Neuropsychiatry                              | 10,997 (3.9%)           | 12,921 (4.5%)           | 11,639 (4.1%)           | 10,930 (3.9%)           | 10,343 (3.6%)           | 10,618 (4.0%)           | 7,342 (2.9%)            |
| Intensive care unit*                         | 4,068 (1.5%)            | 4,036 (1.4%)            | 4,272 (1.5%)            | 3,990 (1.4%)            | 4,160 (1.5%)            | 3,842 (1.4%)            | 3,793 (1.5%)            |

\*: Patients in intensive care unit belongs to each department in the university hospital.

**Table S5.** Standardized antimicrobial administration ratio of adult broad-spectrum antibacterial agents predominantly used for hospital-onset infections in the Department of Respiratory Medicine, the Department of Colorectal Surgery, and the intensive care unit

| Department           | Standardized antimicrobial administration ratio |                          |                          |                          |                          |                          |                          |
|----------------------|-------------------------------------------------|--------------------------|--------------------------|--------------------------|--------------------------|--------------------------|--------------------------|
|                      | April 2015 to March 2016                        | April 2016 to March 2017 | April 2017 to March 2018 | April 2018 to March 2019 | April 2019 to March 2020 | April 2020 to March 2021 | April 2021 to March 2022 |
| Intensive care unit  | 1.633                                           | 1.819                    | 1.693                    | 1.440                    | 1.251                    | 1.100                    | 1.283                    |
| Respiratory medicine | 0.504                                           | 0.747                    | 0.885                    | 0.880                    | 1.037                    | 1.008                    | 1.008                    |
| Colorectal surgery   | 0.985                                           | 1.204                    | 1.105                    | 0.912                    | 0.929                    | 0.699                    | 1.065                    |

**Table S6.** Annual change in the isolation rates of carbapenemase-producing Enterobacteriaceae and carbapenem-resistant isolates in Enterobacteriaceae sp., *Pseudomonas aeruginosa*, and *Acinetobacter baumannii*

| Organisms                      | Carbapenem Resistant organisms                      | 2015 Apr.–<br>2016 Mar. | 2016 Apr.–<br>2017 Mar. | 2017 Apr.–<br>2018 Mar. | 2018 Apr.–<br>2019 Mar. | 2019 Apr.–<br>2020 Mar. | 2020 Apr.–<br>2021 Mar. | 2021 Apr.–<br>2022 Mar. | Total              |
|--------------------------------|-----------------------------------------------------|-------------------------|-------------------------|-------------------------|-------------------------|-------------------------|-------------------------|-------------------------|--------------------|
| Enterobacteriaceae spp.        | Carbapenemase-producing Enterobacteriaceae          | 12/1099<br>(1.1%)       | 4/1022<br>(0.4%)        | 0/902<br>(0.0%)         | 1/988<br>(0.1%)         | 2/1179<br>(0.2%)        | 3/1313<br>(0.2%)        | 1/1335<br>(0.1%)        | 23/7838<br>(0.3%)  |
|                                | Carbapenem-resistant Enterobacteriaceae             | 1/1099<br>(0.1%)        | 2/1022<br>(0.2%)        | 1/902<br>(0.1%)         | 5/988<br>(0.5%)         | 3/1179<br>(0.3%)        | 1/1313<br>(0.1%)        | 1/1335<br>(0.1%)        | 14/7838<br>(0.2%)  |
| <i>Pseudomonas aeruginosa</i>  | Carbapenem-resistant <i>Pseudomonas aeruginosa</i>  | 15/184<br>(8.2%)        | 7/183<br>(3.8%)         | 7/170<br>(4.1%)         | 13/172<br>(7.6%)        | 16/211<br>(7.6%)        | 15/205<br>(7.3%)        | 32/267<br>(12.0%)       | 105/1392<br>(7.5%) |
| <i>Acinetobacter baumannii</i> | Carbapenem-resistant <i>Acinetobacter baumannii</i> | 0/51<br>(0.0%)          | 0/68<br>(0.0%)          | 1/44<br>(2.3%)          | 0/25<br>(0.0%)          | 0/47<br>(0.0%)          | 1/48<br>(2.1%)          | 1/38<br>(2.6%)          | 3/321<br>(0.9%)    |

Table S7. Resistance rates against antibiotics with anti-*Pseudomonas* activity in glucose non-fermenting Gram-negative rods and Enterobacteriaceae spp.

| Organisms                                 | No. of strains | No. of resistant organisms against antibiotics with anti-pseudomonas activity |                             |              |                                                                                                      |                            |
|-------------------------------------------|----------------|-------------------------------------------------------------------------------|-----------------------------|--------------|------------------------------------------------------------------------------------------------------|----------------------------|
|                                           |                | Meropenem (%)                                                                 | Piperacillin/tazobactam (%) | Cefepime (%) | Ciprofloxacin for glucose non-fermenting Gram-negative rods; levofloxacin for Enterobacteriaceae (%) | Gentamicin or amikacin (%) |
| Glucose non-fermenting Gram-negative rods | 1713           | 108 (6.3%)                                                                    | 231 (13.5%)                 | 240 (14.0%)  | 274 (16.0%)                                                                                          | 55 (3.2%)                  |
| <i>Pseudomonas aeruginosa</i>             | 1392           | 105 (7.5%)                                                                    | 183 (13.1%)                 | 224 (16.1%)  | 253 (18.2%)                                                                                          | 36 (2.6%) <sup>*</sup>     |
| <i>Acinetobacter baumannii</i>            | 321            | 3 (0.9%)                                                                      | 48 (15.0%)                  | 16 (5.0%)    | 21 (6.5%)                                                                                            | 19 (5.9%)                  |
| Enterobacteriaceae spp.                   | 7838           | 14 (0.2%)                                                                     | 526 (6.7%)                  | 1000 (12.8%) | 1441 (18.4%)                                                                                         | 630 (8.0%)                 |
| <i>Escherichia coli</i>                   | 2863           | 0 (0.0%)                                                                      | 90 (3.1%)                   | 671 (23.4%)  | 1121 (39.2%)                                                                                         | 412 (14.4%)                |
| <i>Klebsiella pneumoniae</i>              | 1685           | 7 (0.4%)                                                                      | 82 (4.9%)                   | 158 (9.4%)   | 124 (7.4%)                                                                                           | 114 (6.8%)                 |
| <i>Klebsiella oxytoca</i>                 | 670            | 1 (0.1%)                                                                      | 47 (7.0%)                   | 21 (3.1%)    | 23 (3.4%)                                                                                            | 9 (1.3%)                   |
| <i>Klebsiella aerogenes</i>               | 339            | 2 (0.6%)                                                                      | 54 (15.9%)                  | 15 (4.4%)    | 11 (3.2%)                                                                                            | 5 (1.5%)                   |
| <i>Enterobacter cloacae</i>               | 960            | 2 (0.2%)                                                                      | 213 (22.2%)                 | 101 (10.5%)  | 71 (7.4%)                                                                                            | 21 (2.2%)                  |
| Other Enterobacteriaceae                  | 1321           | 2 (0.2%)                                                                      | 40 (3.0%)                   | 34 (2.6%)    | 91 (6.9%)                                                                                            | 69 (5.2%)                  |
| <i>Serratia marcescens</i>                | 382            | 0 (0.0%)                                                                      | 17 (4.5%)                   | 5 (1.3%)     | 13 (3.4%)                                                                                            | 101 (26.4%)                |
| <i>Citrobacter freundii</i>               | 300            | 2 (0.7%)                                                                      | 11 (3.7%)                   | 10 (3.3%)    | 33 (11.0%)                                                                                           | 10 (3.3%)                  |
| <i>Proteus mirabilis</i>                  | 204            | 0 (0.0%)                                                                      | 0 (0.0%)                    | 11 (5.4%)    | 37 (18.1%)                                                                                           | 23 (11.3%)                 |
| <i>Proteus vulgaris</i>                   | 140            | 0 (0.0%)                                                                      | 3 (2.1%)                    | 2 (1.4%)     | 3 (2.1%)                                                                                             | 5 (3.6%)                   |
| <i>Morganella morganii</i>                | 295            | 0 (0.0%)                                                                      | 9 (3.1%)                    | 6 (2.0%)     | 5 (1.7%)                                                                                             | 21 (7.1%)                  |

\*: Resistance only for amikacin was evaluated in the resistance rate against aminoglycosides in *Pseudomonas aeruginosa*



**Table S8.** Isolation of resistant or intermediate susceptibility organisms based on CLSI criteria in glucose non-fermenting Gram-negative rods and Enterobacteriaceae spp.

| Organisms                                 | No. of strains | No. of resistant or intermediate susceptibility organisms (rate) |             | No. of resistant organisms against antibiotics with anti-pseudomonas activity |                             |              |                                                                                                      |                            |
|-------------------------------------------|----------------|------------------------------------------------------------------|-------------|-------------------------------------------------------------------------------|-----------------------------|--------------|------------------------------------------------------------------------------------------------------|----------------------------|
|                                           |                | ≥2 classes                                                       | ≥3 classes  | Meropenem (%)                                                                 | Piperacillin/tazobactam (%) | Cefepime (%) | Ciprofloxacin for glucose non-fermenting Gram-negative rods; levofloxacin for Enterobacteriaceae (%) | Gentamicin or amikacin (%) |
| Glucose non-fermenting Gram-negative rods | 1713           | 293 (17.1%)                                                      | 165 (9.6%)  | 241 (14.1%)                                                                   | 231 (13.5%)                 | 240 (14.0%)  | 230 (13.4%)                                                                                          | 264 (15.4%)                |
| <i>Pseudomonas aeruginosa</i>             | 1392           | 270 (19.4%)                                                      | 159 (11.4%) | 233 (16.7%)                                                                   | 183 (13.1%)                 | 224 (16.1%)  | 209 (15.0%)                                                                                          | 245 (17.6%)                |
| <i>Acinetobacter baumannii</i>            | 321            | 23 (7.2%)                                                        | 6 (1.9%)    | 8 (2.5%)                                                                      | 48 (15.0%)                  | 16 (5.0%)    | 21 (6.5%)                                                                                            | 19 (5.9%)                  |
| Enterobacteriaceae spp.                   | 7838           | 1082 (13.8%)                                                     | 284 (3.6%)  | 45 (0.6%)                                                                     | 478 (6.1%)                  | 1053 (13.4%) | 1343 (17.1%)                                                                                         | 495 (6.3%)                 |
| <i>Escherichia coli</i>                   | 2863           | 771 (26.9%)                                                      | 173 (6.0%)  | 6 (0.2%)                                                                      | 86 (3.0%)                   | 708 (24.7%)  | 1109 (38.7%)                                                                                         | 329 (11.5%)                |
| <i>Klebsiella pneumonia</i>               | 1685           | 131 (7.8%)                                                       | 80 (4.7%)   | 19 (1.1%)                                                                     | 65 (3.9%)                   | 165 (9.8%)   | 113 (6.7%)                                                                                           | 104 (6.2%)                 |
| <i>Klebsiella oxytoca</i>                 | 670            | 25 (3.7%)                                                        | 10 (1.5%)   | 1 (0.1%)                                                                      | 46 (6.9%)                   | 24 (3.6%)    | 19 (2.8%)                                                                                            | 9 (1.3%)                   |
| <i>Klebsiella aerogenes</i>               | 339            | 14 (4.1%)                                                        | 6 (1.8%)    | 5 (1.5%)                                                                      | 49 (14.5%)                  | 15 (4.4%)    | 5 (1.5%)                                                                                             | 4 (1.2%)                   |
| <i>Enterobacter cloacae</i>               | 960            | 111 (11.6%)                                                      | 9 (0.9%)    | 8 (0.8%)                                                                      | 195 (20.3%)                 | 105 (10.9%)  | 45 (4.7%)                                                                                            | 9 (0.9%)                   |
| Other Enterobacteriaceae spp.             | 1321           | 30 (2.3%)                                                        | 6 (0.5%)    | 6 (0.5%)                                                                      | 37 (2.8%)                   | 36 (2.7%)    | 52 (3.9%)                                                                                            | 40 (3.0%)                  |
| <i>Serratia marcescens</i>                | 382            | 3 (0.8%)                                                         | 1 (0.3%)    | 2 (0.5%)                                                                      | 15 (3.9%)                   | 5 (1.3%)     | 5 (1.3%)                                                                                             | 6 (1.6%)                   |
| <i>Citrobacter freundii</i>               | 300            | 11 (3.7%)                                                        | 4 (1.3%)    | 4 (1.3%)                                                                      | 11 (3.7%)                   | 10 (3.3%)    | 19 (6.3%)                                                                                            | 8 (2.7%)                   |
| <i>Proteus mirabilis</i>                  | 204            | 5 (2.5%)                                                         | 0 (0.0%)    | 0 (0.0%)                                                                      | 0 (0.0%)                    | 12 (5.9%)    | 24 (11.8%)                                                                                           | 8 (3.9%)                   |
| <i>Proteus vulgaris</i>                   | 140            | 3 (2.1%)                                                         | 0 (0.0%)    | 0 (0.0%)                                                                      | 2 (1.4%)                    | 2 (1.4%)     | 1 (0.7%)                                                                                             | 1 (0.7%)                   |
| <i>Morganella morganii</i>                | 295            | 8 (2.7%)                                                         | 1 (0.3%)    | 0 (0.0%)                                                                      | 9 (3.1%)                    | 7 (2.4%)     | 3 (1.0%)                                                                                             | 17 (5.8%)                  |

**Table S9.** Correlation between the quarterly antimicrobial heterogeneity index (AHI), modified AHI, and days of therapy per 100 patient-days for broad-spectrum antibiotics, and the quarterly rate of resistant organisms among glucose non-fermenting Gram-negative rods and Enterobacteriaceae spp. between April 2015 and March 2022

|                                           | Antimicrobial heterogeneity index |                |                 |                  | Modified antimicrobial heterogeneity index |                |                 |                  | DOT (days of therapy per 100 patient-days) |                |                 |                 |
|-------------------------------------------|-----------------------------------|----------------|-----------------|------------------|--------------------------------------------|----------------|-----------------|------------------|--------------------------------------------|----------------|-----------------|-----------------|
|                                           | Gradient                          | R <sup>2</sup> | <i>p</i> -Value | 95% CI           | Gradient                                   | R <sup>2</sup> | <i>p</i> -Value | 95% CI           | Gradient                                   | R <sup>2</sup> | <i>p</i> -Value | 95% CI          |
| Glucose non-fermenting Gram-negative rods |                                   |                |                 |                  |                                            |                |                 |                  |                                            |                |                 |                 |
| ≥ 2 antibiotic classes                    | -0.391                            | 0.176          | 0.026           | -0.685 to -0.054 | -0.557                                     | 0.320          | 0.002           | -0.775 to -0.245 | 0.003                                      | 0.005          | 0.727           | -0.312 to 0.431 |
| ≥ 3 antibiotic classes                    | -0.337                            | 0.166          | 0.031           | -0.678 to -0.041 | -0.478                                     | 0.302          | 0.002           | -0.766 to -0.222 | 0.001                                      | 0.000          | 0.950           | -0.362 to 0.384 |
| Enterobacteriaceae spp.                   |                                   |                |                 |                  |                                            |                |                 |                  |                                            |                |                 |                 |
| ≥ 2 antibiotic classes                    | -0.253                            | 0.208          | 0.015           | -0.708 to -0.099 | -0.310                                     | 0.280          | 0.004           | -0.753 to -0.194 | -0.001                                     | 0.001          | 0.908           | -0.393 to 0.353 |
| ≥ 3 antibiotic classes                    | -0.045                            | 0.020          | 0.476           | -0.488 to 0.245  | -0.060                                     | 0.031          | 0.372           | -0.515 to 0.211  | 0.000                                      | 0.000          | 0.948           | -0.384 to 0.362 |

95% CI: 95% confidence interval
